# Supplementary material
Source: PubMed Central journal article supplement (PMC3156660)
Supplement: neo1308_0692SD1.pdf [file neo1308_0692SD1.pdf]

**Table W1.** List of Oligonucleotides Used for Quantitative PCR Analysis.

| Gene (Symbol) or Amplicon  | Primer Sequences (Sense and Antisense, 5' → 3')                   |
|----------------------------|-------------------------------------------------------------------|
| <i>CXCL2</i>               | GCGCCAGACAGAAGTCATAG<br>AGCCTTGCCTTTGTTCAGTATC                    |
| <i>CXCL5</i>               | GAAAGCTAAGCGGAATGCAC<br>GGACAATGGTTTCCCCTTTT                      |
| <i>CXCL10</i>              | GCTCCTGCATCAGCACCAGC<br>CTTGAACGACGACGACTTTGG                     |
| <i>CXCL15</i>              | CCA TGG GTG AAG GCT ACT GT<br>TCT CAG GTC TCC CAA ATG AAA         |
| <i>Cytokeratin18</i>       | CAGCCAGCGTCTATGCAGG<br>CTTCTCGGTCTGGATTCCAC                       |
| <i>ICAM1</i>               | TGC GTT TTG GAG CTA GCG GAC CA<br>CGA GGA CCA TAC AGC ACG TGC AG  |
| <i>TNF</i>                 | TAGCCAGGAGGGAGAACAGA<br>TTTTCTGAGGGAGATGTGG                       |
| <i>E-Cadherin</i>          | AAGTGACCGATGATGATGCC<br>CTTCTCTGCCATCTCAGCG                       |
| <i>Collagen1</i>           | CAC CCT CAA GAG CCT GAG TC<br>GTT CGG GCT GAT GTA CCA GT          |
| <i>Flag-IKK2</i>           | GAC TAC AAG GAC GAC GAT GAC AAG<br>GGT TCA GCC TTC TCA TGA TCT GG |
| <i>SFRP1</i>               | CAACGTGGGCTACAAGAAGAT<br>GGCCAGTAGAAGCCGAAGAAC                    |
| <i>SFRP4</i>               | AGAAGGTCCATACAGTGGGAAG<br>GTTACTGCGACTGGTGCGA                     |
| <i>Nkx3-1</i>              | ATGCTTAGGGTAGCGGAGC<br>TGCGGATTGCCTGAGTGTC                        |
| <i>Spink3</i>              | ATG AAG GTG GCT GTC ATC TTT C<br>TCA GCA AGG CCC ACC TTT TCG      |
| <i>Smooth muscle actin</i> | GTCCCAGACATCAGGGAGTAA<br>TCGGATACTTCAGCGTCAGGA                    |
| <i>Probasin</i>            | AAGGCTCACCATTGAGAACCT<br>CAGTTGGCACTTAGTCCCTTTC                   |
| <i>MYH11</i>               | AAGCTGCGGCTAGAGGTCA<br>CCCTCCCTTTGATGGCTGAG                       |
| <i>HPRT</i>                | CAA ATC AAA AGT CTG GGG ACG C<br>GCT TGC TGG TGA AAA GGA CCT C    |

**Table W2.** List of Antibodies Used in This Study.

| Antibody/Antigen                           | Source/Catalog No. (or Equivalent)       | Use/Dilution          |
|--------------------------------------------|------------------------------------------|-----------------------|
| CD3e                                       | eBioscience/13-0031                      | IF-F/1:200            |
| F4/80                                      | eBioscience/13-4801                      | IF-F/1:200            |
| CD11b                                      | eBioscience/13-0112                      | IF-F/1:200            |
| Gr-1                                       | eBioscience/13-5931                      | IF-F/1:200            |
| Ki67                                       | Neomarkers/RM-9106-S1                    | IF-P/1:200            |
| Lipocalin2                                 | Santa Cruz/sc-18698                      | IHC-P/1:200           |
| Nkx3-1                                     | Santa Cruz/sc-15022                      | IB/1:400              |
| Smooth muscle actin                        | Sigma/C6198                              | IF-P/1:400            |
| P63                                        | Santa Cruz/sc-56188                      | IF-P/1:100            |
| Cytokeratin14                              | Prof E.B. Lane<br>(University of Dundee) | IF-cells/1:10         |
| Androgen receptor                          | Santa Cruz/sc-815                        | IF-P/1:100            |
| $\beta$ -Tubulin                           | Santa Cruz/sc-9104                       | IB/1:400              |
| I $\kappa$ B $\alpha$                      | Santa Cruz/sc-371                        | IB/1:1000, IF-F/1:100 |
| ICAM1                                      | eBioscience/14-0541                      | IF-F/1:100            |
| A555 goat antirabbit                       | Invitrogen/A-21428                       | IF-P, IF-F/1:2000     |
| Biotin antirabbit                          | Vector Laboratories/BA-1000              | IHC-P/1:400           |
| Biotin antigoat                            | Vector Laboratories/BA-9500              | IHC-P/1:400           |
| Biotin antimouse                           | Vector Laboratories/BA-9200              | IHC-P/1:400           |
| Streptavidin, Alexa Fluor<br>555 conjugate | Invitrogen/S32355                        | IF-F/1:500            |

F indicates frozen sections; IB, immunoblot; IF, immunofluorescence; IHC, immunohistochemistry; P, paraffin sections.

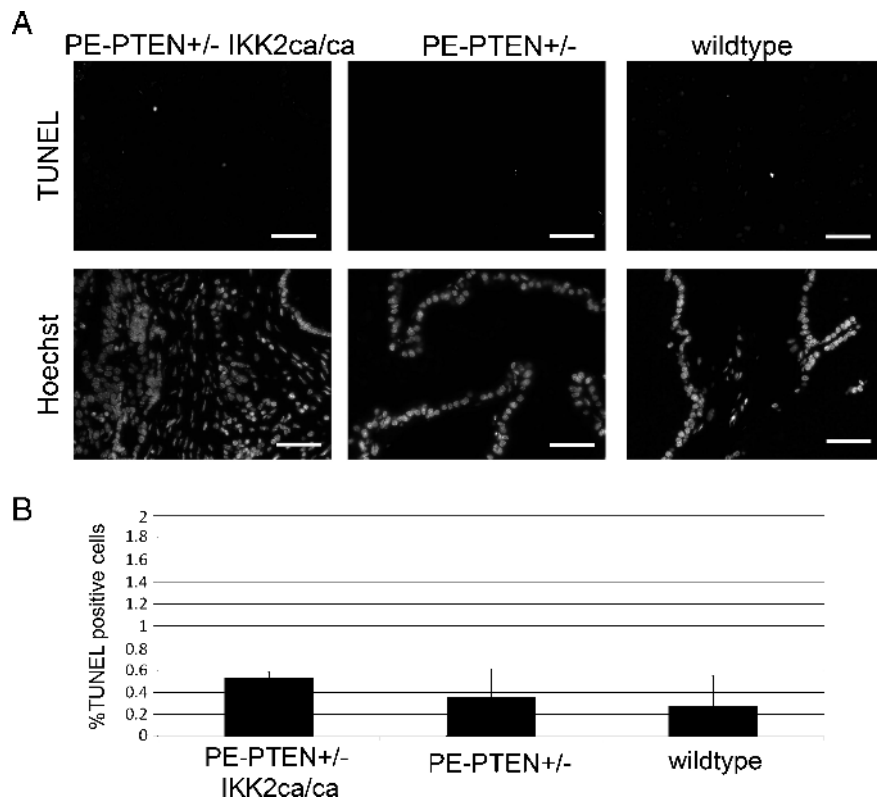

**Figure W1.** TUNEL stain indicating no change in apoptosis in transgenic *versus* wild-type prostates. (A) TUNEL staining (see Materials and Methods) was performed on paraffin sections from prostates of the indicated genotypes. Hoechst staining is given to indicate tissue architecture and cell density. (B) Quantification of TUNEL-positive cells in lateral cells in the lateral prostates of the indicated genotypes ( $n = 4$  per group). Error bars, SEM. No statistical significance was reached in the analysis of variance.

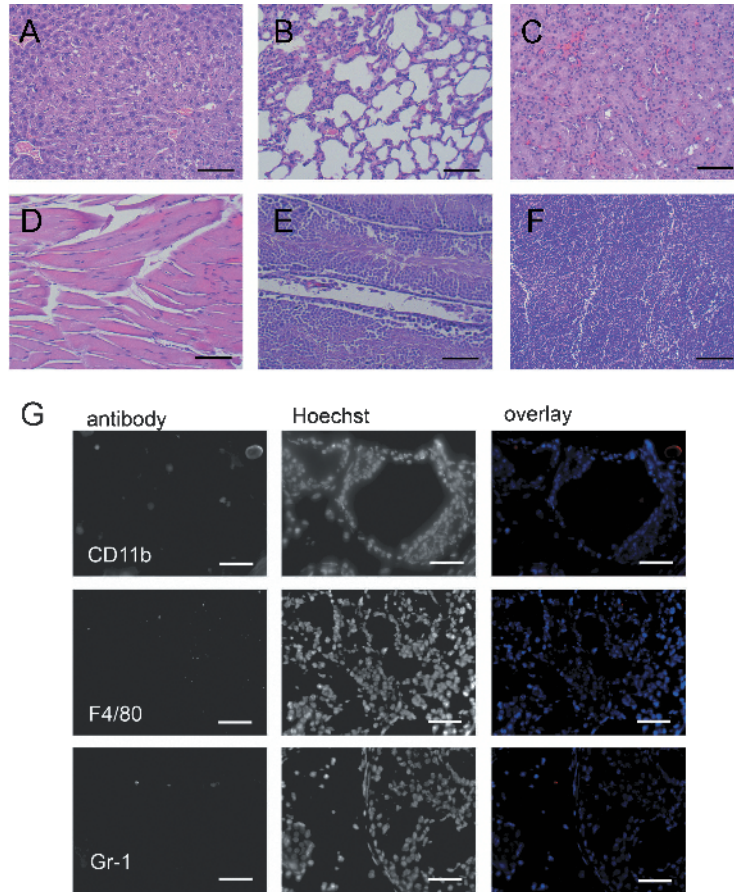

**Figure W2.** Normal histologic finding of nonprostate tissues from PE-PTEN<sup>+/-</sup> IKK2<sup>ca/ca</sup> mice (A-F) and lack of immunoreactivity in PE-PTEN<sup>+/-</sup> lateral prostates (G). H&E stains are shown for liver (A), lung (B), kidney (C), muscle tissue surrounding the urethra (D), testis (E), and lymph node (F). Scale bars, 100  $\mu$ m. (G) Antibody staining in PE-PTEN<sup>+/-</sup> lateral prostates. Scale bars, 50  $\mu$ m.

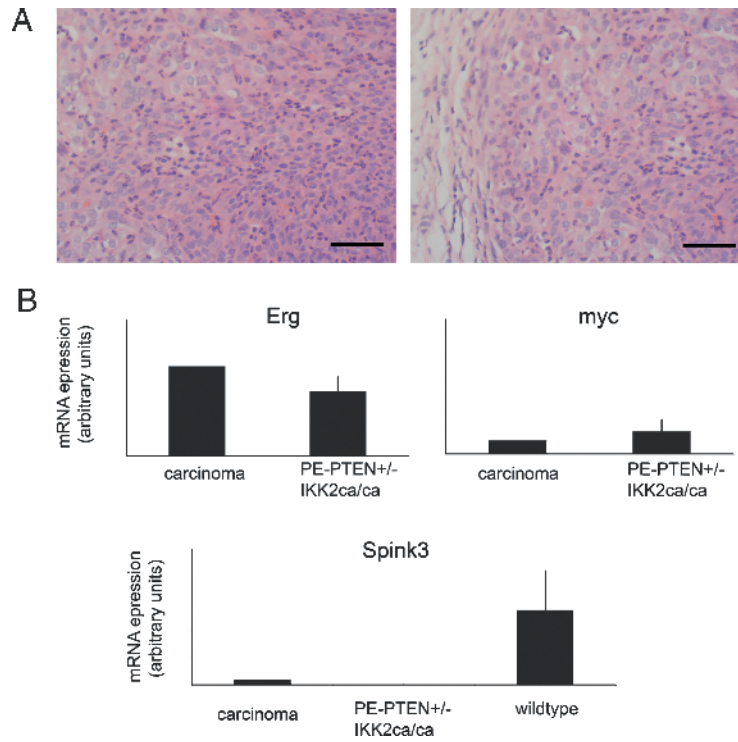

**Figure W3.** Carcinoma formation in a PTEN<sup>+/-</sup>IKK2ca/ca lateral prostate (12 months). (A) H&E stain of the tumor itself (left) and adjacent to the stroma (right). (B) Quantitative PCR data of carcinoma ( $n = 1$ ) compared with PE-PTEN<sup>+/-</sup>IKK2ca/ca prostate ( $n = 3$ ) or wild-type prostate ( $n = 3$ ). Scale bars, 50  $\mu$ m.

**Table W3.** The 100 Most Overexpressed Genes in the Microarray Study Comparing PE-PTEN+/-IKK2ca/ca to PE-PTEN+/-.

| Gene Symbol     | Full Name                                                    | Fold Expression |
|-----------------|--------------------------------------------------------------|-----------------|
| <i>Msh</i>      | Mesothelin                                                   | 33.12           |
| <i>Ly6d</i>     | Lymphocyte antigen 6 complex, locus D                        | 13.64           |
| <i>Gabrp</i>    | $\gamma$ -Aminobutyric acid (GABA) A receptor, pi            | 13.16           |
| <i>Hp</i>       | Haptoglobin                                                  | 11.96           |
| <i>Clca2</i>    | Chloride channel calcium activated 2                         | 11.78           |
| <i>Cxcl5</i>    | Chemokine (C-X-C motif) ligand 5                             | 11.68           |
| <i>Olfm4</i>    | Olfactomedin 4                                               | 9.95            |
| <i>Egln3</i>    | EGL nine homolog 3 ( <i>C. elegans</i> )                     | 8.26            |
| <i>Slc01a5</i>  | Solute carrier organic anion transporter family, member 1a5  | 7.98            |
| <i>Sfrp4</i>    | Secreted frizzle-related protein 4                           | 7.76            |
| <i>AW112010</i> | Expressed sequence AW112010                                  | 7.61            |
| <i>Sftpd</i>    | Surfactant associated protein D                              | 7.26            |
| <i>Gdpd3</i>    | Glycerophosphodiester phosphodiesterase domain containing 3  | 7.23            |
| <i>Cxcl15</i>   | Chemokine (C-X-C motif) ligand 15                            | 7.22            |
| <i>Ccdc129</i>  | Coiled-coil domain containing 129                            | 7.00            |
| <i>Cd14</i>     | CD14 antigen                                                 | 6.97            |
| <i>Icam1</i>    | Intercellular adhesion molecule 1                            | 6.94            |
| <i>Tnfrsf10</i> | Tumor necrosis factor (ligand) superfamily, member 10        | 6.90            |
| <i>Car13</i>    | Carbonic anhydrase 13                                        | 6.90            |
| <i>Muc20</i>    | Mucin 20                                                     | 6.78            |
| <i>Ctla2a</i>   | Cytotoxic T-lymphocyte-associated protein 2 $\alpha$         | 6.66            |
| <i>Atp6v1b1</i> | ATPase, H <sup>+</sup> transporting, lysosomal V1 subunit B1 | 6.48            |
| <i>Aspa</i>     | Aspartoacylase                                               | 6.42            |
| <i>C3</i>       | Complement component 3                                       | 6.07            |
| <i>Ltbp2</i>    | Latent transforming growth factor $\beta$ binding protein 2  | 5.98            |
| <i>S100a8</i>   | S100 calcium binding protein A8 (calgranulin A)              | 5.74            |
| <i>Car2</i>     | Carbonic anhydrase 2                                         | 5.57            |
| <i>Cxcl10</i>   | Chemokine (C-X-C motif) ligand 10                            | 5.35            |
| <i>Clic6</i>    | Chloride intracellular channel 6                             | 5.28            |
| <i>Clip4</i>    | CAP-GLY domain containing linker protein family, member 4    | 5.21            |
| <i>Vsig1</i>    | V-set and immunoglobulin domain containing 1                 | 5.20            |
| <i>Wfdc2</i>    | WAP four-disulfide core domain 2                             | 5.18            |
| <i>Il8rb</i>    | Interleukin 8 receptor, $\beta$                              | 5.15            |
| <i>Ccl3</i>     | Chemokine (C-C motif) ligand 3                               | 5.11            |
| <i>Ttc9</i>     | Tetratricopeptide repeat domain 9                            | 5.05            |
| <i>Cyba</i>     | Cytochrome <i>b</i> -245, $\alpha$ polypeptide               | 5.01            |
| <i>Clec4d</i>   | C-type lectin domain family 4, member d                      | 4.94            |
| <i>Cp</i>       | Ceruloplasmin                                                | 4.89            |
| <i>Tnfrsf3</i>  | TNFAIP3 interacting protein 3                                | 4.84            |
| <i>Csf3r</i>    | Colony stimulating factor 3 receptor (granulocyte)           | 4.83            |
| <i>Mmp3</i>     | Matrix metalloproteinase 3                                   | 4.81            |
| <i>Slfm4</i>    | Schlafen 4                                                   | 4.75            |
| <i>Sestd1</i>   | SEC14 and spectrin domains 1                                 | 4.71            |
| <i>Gm7609</i>   | Predicted gene 7609                                          | 4.69            |
| <i>Cpxm1</i>    | Carboxypeptidase X 1 (M14 family)                            | 4.65            |
| <i>Pad14</i>    | Peptidyl arginine deiminase, type IV                         | 4.64            |
| <i>Itgb6</i>    | Integrin $\beta$ 6                                           | 4.63            |
| <i>Srgn</i>     | Serglycin                                                    | 4.59            |
| <i>Gm7609</i>   | Predicted gene 7609                                          | 4.58            |
| <i>Cd200r3</i>  | CD200 receptor 3                                             | 4.56            |
| <i>Clec4n</i>   | C-type lectin domain family 4, member n                      | 4.52            |
| <i>H2-Q6</i>    | Histocompatibility 2, Q region locus 6                       | 4.49            |

**Table W3.** (continued)

| Gene Symbol      | Full Name                                                                                 | Fold Expression |
|------------------|-------------------------------------------------------------------------------------------|-----------------|
| <i>Csprs</i>     | Component of Sp100-rs                                                                     | 4.39            |
| <i>Nfkbie</i>    | Nuclear factor of $\kappa$ light polypeptide gene enhancer in B-cells inhibitor, epsilon  | 4.38            |
| <i>Mgat3</i>     | Mannoside acetylglucosaminyltransferase 3                                                 | 4.32            |
| <i>Clca1</i>     | Chloride channel calcium activated 1                                                      | 4.29            |
| <i>Ces3</i>      | Carboxylesterase 3                                                                        | 4.29            |
| <i>Car8</i>      | Carbonic anhydrase 8                                                                      | 4.29            |
| <i>Tnfr</i>      | Tumor necrosis factor                                                                     | 4.28            |
| <i>Csprs</i>     | Component of Sp100-rs                                                                     | 4.26            |
| <i>Wbscr17</i>   | Williams-Beuren syndrome chromosome region 17 homolog (human)                             | 4.18            |
| <i>Gpnm6</i>     | Glycoprotein (transmembrane) nm6                                                          | 4.17            |
| <i>Steap4</i>    | STEAP family member 4                                                                     | 4.13            |
| <i>Slc39a4</i>   | Solute carrier family 39 (zinc transporter), member 4                                     | 4.12            |
| <i>Cxcl2</i>     | Chemokine (C-X-C motif) ligand 2                                                          | 4.10            |
| <i>Pglyrp1</i>   | Peptidoglycan recognition protein 1                                                       | 4.04            |
| <i>Dram1</i>     | DNA-damage regulated autophagy modulator 1                                                | 3.97            |
| <i>Grid2</i>     | Glutamate receptor, ionotropic, delta 2                                                   | 3.94            |
| <i>Atp6v0d2</i>  | ATPase, H <sup>+</sup> transporting, lysosomal V0 subunit D2                              | 3.90            |
| <i>Itga2</i>     | Integrin $\alpha$ 2                                                                       | 3.85            |
| <i>Il1f9</i>     | Interleukin 1 family, member 9                                                            | 3.85            |
| <i>Capsl</i>     | Calcyphosine-like                                                                         | 3.84            |
| <i>Pmepa1</i>    | Prostate transmembrane protein, androgen induced 1                                        | 3.80            |
| <i>Clec5a</i>    | C-type lectin domain family 5, member a                                                   | 3.78            |
| <i>Dclk1</i>     | Doublecortin-like kinase 1                                                                | 3.73            |
| <i>S100a9</i>    | S100 calcium binding protein A9 (calgranulin B)                                           | 3.71            |
| <i>Gp49a</i>     | Glycoprotein 49 A                                                                         | 3.69            |
| <i>Ly6k</i>      | Lymphocyte antigen 6 complex, locus K                                                     | 3.65            |
| <i>Mpeg1</i>     | Macrophage expressed gene 1                                                               | 3.64            |
| <i>Il1b</i>      | Interleukin 1 $\beta$                                                                     | 3.62            |
| <i>Cxcr4</i>     | Chemokine (C-X-C motif) receptor 4                                                        | 3.60            |
| <i>Eya2</i>      | Eyes absent 2 homolog ( <i>Drosophila</i> )                                               | 3.59            |
| <i>Tyrobp</i>    | TYRO protein tyrosine kinase binding protein                                              | 3.59            |
| <i>Pdgfrl</i>    | Platelet-derived growth factor receptor-like                                              | 3.58            |
| <i>Sfrp1</i>     | Secreted frizzle-related protein 1                                                        | 3.54            |
| <i>Casp1</i>     | Caspase 1                                                                                 | 3.54            |
| <i>Gda</i>       | Guanine deaminase                                                                         | 3.54            |
| <i>Nfkbia</i>    | Nuclear factor of $\kappa$ light polypeptide gene enhancer in B-cells inhibitor, $\alpha$ | 3.52            |
| <i>Gsdmc2</i>    | Gasdermin C2                                                                              | 3.49            |
| <i>Nedd9</i>     | Neural precursor cell expressed, developmentally downregulated gene 9                     | 3.49            |
| <i>Frzb</i>      | Frizzle-related protein                                                                   | 3.49            |
| <i>Arl14</i>     | ADP-ribosylation factor-like 14                                                           | 3.49            |
| <i>Gm7609</i>    | Predicted gene 7609                                                                       | 3.47            |
| <i>Krt7</i>      | Keratin 7                                                                                 | 3.47            |
| <i>Ubd</i>       | Ubiquitin D                                                                               | 3.45            |
| <i>Fcrls</i>     | Fc receptor-like 5, scavenger receptor                                                    | 3.45            |
| <i>Mmp12</i>     | Matrix metalloproteinase 12                                                               | 3.45            |
| <i>Serpinb11</i> | Serine (or cysteine) peptidase inhibitor, clade B (ovalbumin), member 11                  | 3.44            |
| <i>Tgtp</i>      | T-cell-specific GTPase                                                                    | 3.43            |
| <i>Lyz2</i>      | Lysozyme 2                                                                                | 3.38            |

**Table W4.** The 100 Most Downregulated Genes in the Microarray Study Comparing PE-PTEN+/- IKK2ca/ca to PE-PTEN+/-.

| Gene Symbol          | Full Name                                                                                                                          | Fold Expression |
|----------------------|------------------------------------------------------------------------------------------------------------------------------------|-----------------|
| <i>Spink3</i>        | Serine peptidase inhibitor, Kazal type 3                                                                                           | 0.00            |
| <i>Sbp</i>           | Spermine binding protein                                                                                                           | 0.01            |
| <i>Wfdc3</i>         | WAP four-disulfide core domain 3                                                                                                   | 0.02            |
| <i>Pnliprp1</i>      | Pancreatic lipase-related protein 1                                                                                                | 0.02            |
| <i>Spink5</i>        | Serine peptidase inhibitor, Kazal type 5                                                                                           | 0.03            |
| <i>4930408F14Rik</i> | RIKEN cDNA 4930408F14 gene                                                                                                         | 0.04            |
| <i>4930408F14Rik</i> | RIKEN cDNA 4930408F14 gene                                                                                                         | 0.04            |
| <i>4930408F14Rik</i> | RIKEN cDNA 4930408F14 gene                                                                                                         | 0.04            |
| <i>Syt10</i>         | Synaptotagmin X                                                                                                                    | 0.04            |
| <i>4930408F14Rik</i> | RIKEN cDNA 4930408F14 gene                                                                                                         | 0.05            |
| <i>Abo</i>           | ABO blood group (transferase A, $\alpha$ 1-3-N-acetylgalactosaminyltransferase, transferase B, $\alpha$ 1-3-galactosyltransferase) | 0.05            |
| <i>Eapa2</i>         | Experimental autoimmune prostatitis antigen 2                                                                                      | 0.05            |
| <i>Pbsn</i>          | Probasin                                                                                                                           | 0.06            |
| <i>G6pc2</i>         | Glucose-6-phosphatase, catalytic, 2                                                                                                | 0.06            |
| <i>9530002B09Rik</i> | RIKEN cDNA 9530002B09 gene                                                                                                         | 0.06            |
| <i>Derl3</i>         | Der1-like domain family, member 3                                                                                                  | 0.06            |
| <i>Azgp1</i>         | $\alpha$ -2-Glycoprotein 1, zinc                                                                                                   | 0.07            |
| <i>Atp12a</i>        | ATPase, H <sup>+</sup> /K <sup>+</sup> transporting, nongastric, $\alpha$ polypeptide                                              | 0.07            |
| <i>4930408F14Rik</i> | RIKEN cDNA 4930408F14 gene                                                                                                         | 0.07            |
| <i>Defb10</i>        | Defensin $\beta$ 10                                                                                                                | 0.07            |
| <i>Tgm4</i>          | Transglutaminase 4 (prostate)                                                                                                      | 0.07            |
| <i>4930408F14Rik</i> | RIKEN cDNA 4930408F14 gene                                                                                                         | 0.07            |
| <i>D030018L15Rik</i> | Nuclear receptor coactivator 2 pseudogene                                                                                          | 0.07            |
| <i>4930408F14Rik</i> | RIKEN cDNA 4930408F14 gene                                                                                                         | 0.08            |
| <i>Pcp4</i>          | Purkinje cell protein 4                                                                                                            | 0.08            |
| <i>4930408F14Rik</i> | RIKEN cDNA 4930408F14 gene                                                                                                         | 0.08            |
| <i>Gm5615</i>        | Predicted gene 5615                                                                                                                | 0.08            |
| <i>Defb1</i>         | Defensin $\beta$ 1                                                                                                                 | 0.09            |
| <i>Ceacam2</i>       | Carcinoembryonic antigen-related cell adhesion molecule 2                                                                          | 0.09            |
| <i>Hmgcs2</i>        | 3-Hydroxy-3-methylglutaryl-coenzyme A synthase 2                                                                                   | 0.09            |
| <i>Htr3a</i>         | 5-Hydroxytryptamine (serotonin) receptor 3A                                                                                        | 0.09            |
| <i>Atp6v1c2</i>      | ATPase, H <sup>+</sup> transporting, lysosomal V1 subunit C2                                                                       | 0.09            |
| <i>Cyp3a57</i>       | Cytochrome P450, family 3, subfamily a, polypeptide 57                                                                             | 0.10            |
| <i>Agtr1a</i>        | Angiotensin II receptor, type 1a                                                                                                   | 0.10            |
| <i>Mme</i>           | Membrane metalloendopeptidase                                                                                                      | 0.10            |
| <i>Prom2</i>         | Prominin 2                                                                                                                         | 0.10            |
| <i>Aass</i>          | Aminoacidipate-semialdehyde synthase                                                                                               | 0.11            |
| <i>Slc9a2</i>        | Solute carrier family 9 (sodium/hydrogen exchanger), member 2                                                                      | 0.11            |
| <i>Epha3</i>         | Eph receptor A3                                                                                                                    | 0.11            |
| <i>Smgc</i>          | Submandibular gland protein C                                                                                                      | 0.11            |
| <i>Decaf12l1</i>     | DDB1 and CUL4 associated factor 12-like 1                                                                                          | 0.11            |
| <i>Myh11</i>         | Myosin, heavy polypeptide 11, smooth muscle                                                                                        | 0.12            |
| <i>Acrbp</i>         | Proacrosin binding protein                                                                                                         | 0.12            |
| <i>Apof</i>          | Apolipoprotein F                                                                                                                   | 0.12            |
| <i>Nkx2-6</i>        | NK2 transcription factor related, locus 6 ( <i>Drosophila</i> )                                                                    | 0.12            |
| <i>Hhip</i>          | Hedgehog-interacting protein                                                                                                       | 0.12            |
| <i>Egf</i>           | Epidermal growth factor                                                                                                            | 0.12            |
| <i>Upb1</i>          | Ureidopropionase, $\beta$                                                                                                          | 0.13            |
| <i>Prlr</i>          | Prolactin receptor                                                                                                                 | 0.13            |
| <i>Spc25</i>         | SPC25, NDC80 kinetochore complex component, homolog ( <i>S. cerevisiae</i> )                                                       | 0.13            |
| <i>Nkx3-1</i>        | NK-3 transcription factor, locus 1 ( <i>Drosophila</i> )                                                                           | 0.13            |
| <i>Hpgd</i>          | Hydroxyprostaglandin dehydrogenase 15 (NAD)                                                                                        | 0.13            |
| <i>Prlr</i>          | Prolactin receptor                                                                                                                 | 0.14            |

**Table W4.** (continued)

| Gene Symbol          | Full Name                                                         | Fold Expression |
|----------------------|-------------------------------------------------------------------|-----------------|
| <i>Gpr165</i>        | G protein-coupled receptor 165                                    | 0.14            |
| <i>Cbs</i>           | Cystathionine $\beta$ -synthase                                   | 0.14            |
| <i>Slc30a10</i>      | Solute carrier family 30, member 10                               | 0.14            |
| <i>Bmpr1b</i>        | Bone morphogenetic protein receptor, type 1B                      | 0.14            |
| <i>Fcgbp</i>         | Fc fragment of IgG binding protein                                | 0.15            |
| <i>Fam38b2</i>       | Family with sequence similarity 38, member B2                     | 0.15            |
| <i>Srd5a2</i>        | Steroid 5 $\alpha$ -reductase 2                                   | 0.15            |
| <i>Fam38b</i>        | Family with sequence similarity 38, member B                      | 0.15            |
| <i>Cdh8</i>          | Cadherin 8                                                        | 0.15            |
| <i>Spink11</i>       | Serine peptidase inhibitor, Kazal type 11                         | 0.16            |
| <i>Gabra4</i>        | $\gamma$ -Aminobutyric acid (GABA) A receptor, subunit $\alpha$ 4 | 0.16            |
| <i>Abca5</i>         | ATP-binding cassette, subfamily A (ABC1), member 5                | 0.16            |
| <i>Pdzk1</i>         | PDZ domain containing 1                                           | 0.16            |
| <i>Slc30a2</i>       | Solute carrier family 30 (zinc transporter), member 2             | 0.16            |
| <i>Acrv1c</i>        | Activin A receptor, type 1C                                       | 0.17            |
| <i>H2-Q10</i>        | Histocompatibility 2, Q region locus 10                           | 0.17            |
| <i>Fah</i>           | Fumarylacetoacetate hydrolase                                     | 0.17            |
| <i>Bhlha15</i>       | Basic helix-loop-helix family, member a15                         | 0.17            |
| <i>Slc26a4</i>       | Solute carrier family 26, member 4                                | 0.17            |
| <i>Cckar</i>         | Cholecystokinin A receptor                                        | 0.17            |
| <i>Cnn1</i>          | Calponin 1                                                        | 0.18            |
| <i>Wif1</i>          | Wnt inhibitory factor 1                                           | 0.18            |
| <i>Ggt1</i>          | $\gamma$ -Glutamyltransferase 1                                   | 0.18            |
| <i>Cyp2j13</i>       | Cytochrome P450, family 2, subfamily j, polypeptide 13            | 0.18            |
| <i>Slc5a3</i>        | Solute carrier family 5 (inositol transporters), member 3         | 0.18            |
| <i>Orud7a</i>        | OTU domain containing 7A                                          | 0.18            |
| <i>Gm1574</i>        | Predicted gene 1574                                               | 0.19            |
| <i>Defb50</i>        | Defensin $\beta$ 50                                               | 0.19            |
| <i>Slc18a1</i>       | Solute carrier family 18 (vesicular monoamine), member 1          | 0.20            |
| <i>Chn2</i>          | Chimerin (chimaerin) 2                                            | 0.20            |
| <i>Tmem45a</i>       | Transmembrane protein 45a                                         | 0.20            |
| <i>Man1a</i>         | Mannosidase 1, $\alpha$                                           | 0.20            |
| <i>Spink8</i>        | Serine peptidase inhibitor, Kazal type 8                          | 0.20            |
| <i>Glb1l3</i>        | Galactosidase, $\beta$ 1 like 3                                   | 0.20            |
| <i>5430419D17Rik</i> | RIKEN cDNA 5430419D17 gene                                        | 0.21            |
| <i>9130230L23Rik</i> | RIKEN cDNA 9130230L23 gene                                        | 0.21            |
| <i>Fam115c</i>       | Family with sequence similarity 115, member C                     | 0.21            |
| <i>Myh9</i>          | Myosin, light polypeptide 9, regulatory                           | 0.21            |
| <i>Rab39b</i>        | RAB39B, member RAS oncogene family                                | 0.21            |
| <i>Ms4a5</i>         | Membrane-spanning 4 domains, subfamily A, member 5                | 0.22            |
| <i>Gnmt</i>          | Glycine N-methyltransferase                                       | 0.22            |
| <i>P2rx1</i>         | Purinergic receptor P2X, ligand-gated ion channel, 1              | 0.22            |
| <i>Doc2b</i>         | Double C2, $\beta$                                                | 0.22            |
| <i>BC005685</i>      | cDNA sequence BC005685                                            | 0.22            |
| <i>Bmp7</i>          | Bone morphogenetic protein 7                                      | 0.22            |
| <i>BC005685</i>      | cDNA sequence BC005685                                            | 0.22            |
| <i>Upk1a</i>         | Uroplakin 1A                                                      | 0.22            |
| <i>Nxf7</i>          | Nuclear RNA export factor 7                                       | 0.22            |
| <i>Rnase1</i>        | Ribonuclease, RNase A family, 1 (pancreatic)                      | 0.23            |
| <i>BC005685</i>      | cDNA sequence BC005685                                            | 0.23            |
| <i>Ndr2</i>          | N-myc downstream regulated gene 2                                 | 0.23            |
| <i>Slco4c1</i>       | Solute carrier organic anion transporter family, member 4C1       | 0.23            |
| <i>Gpr110</i>        | G protein-coupled receptor 110                                    | 0.23            |
| <i>Slc22a1</i>       | Solute carrier family 22 (organic cation transporter), member 1   | 0.23            |
| <i>Proc</i>          | Protein C                                                         | 0.24            |
| <i>Acrv1</i>         | Acrosomal vesicle protein 1                                       | 0.24            |
| <i>Aldh6a1</i>       | Aldehyde dehydrogenase family 6, subfamily A1                     | 0.25            |

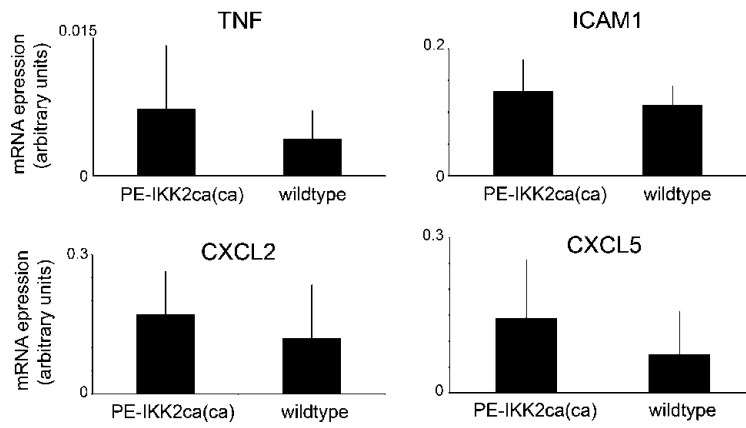

**Figure W4.** Quantitative PCR analysis of NF-κB-dependent target genes in IKK2ca(ca) lateral prostates compared with wild-type (12 months;  $n = 5$  per group). Error bars, SEM.

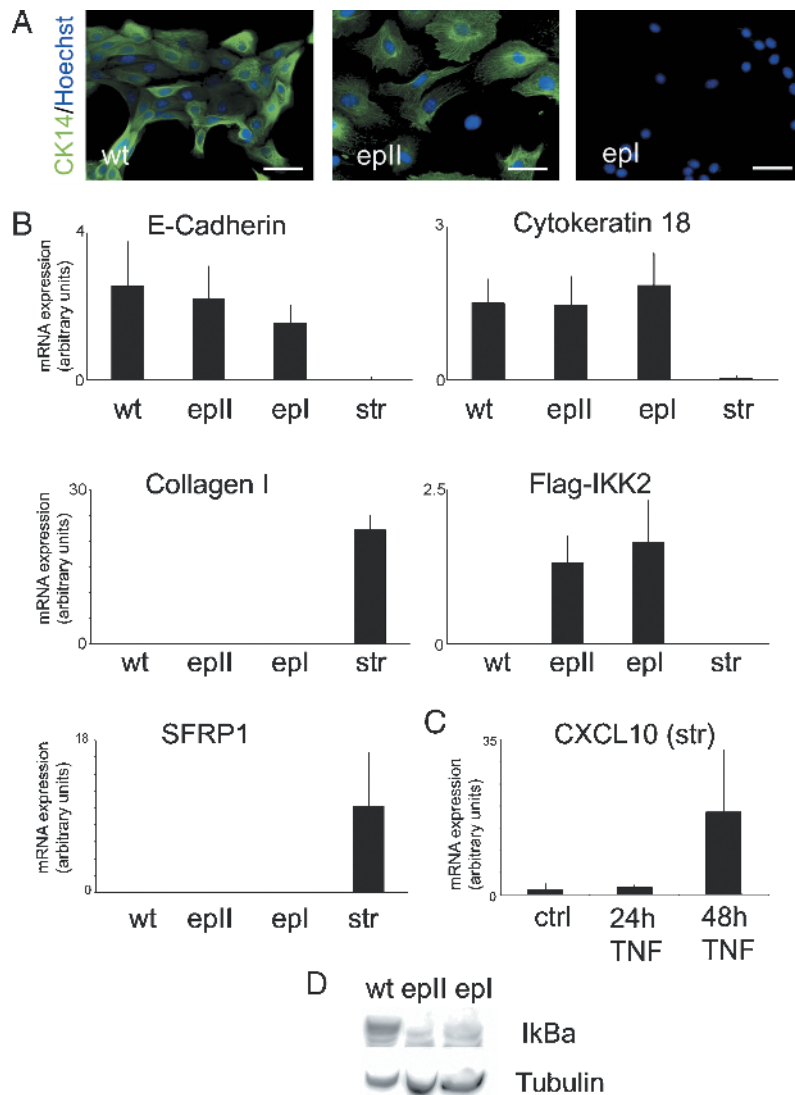

**Figure W5.** Expression of epithelial and stromal markers in epithelial and stromal cell lines. (A) Colored image of cytokeratin 14 (CK14) staining of indicated epithelial cell lines in culture. Green indicates CK14 signal; blue, Hoechst signal. Scale bars, 50  $\mu$ m. (B) Expression profile of epithelial and stromal cell lines. The mRNA expression was determined by quantitative RT-PCR. (C) Expression of CXCL10 mRNA in the stromal cell line (str) on treatment with TNF (10 ng/ml). Ctrl indicates control cells (untreated). (D) Western blot showing degradation of I $\kappa$ B $\alpha$  in transgenic cells, indicating IKK2 activity.
